# Supplementary material for: Synthesis and preliminary anti-inflammatory and anti-bacterial evaluation of some diflunisal aza-analogs
Source: Royal Society of Chemistry journal article supplement (doi:10.1039/c8md00139a), 2018-01-01
Supplement: c8md00139a1.pdf [file c8md00139a1.pdf]

Synthesis and preliminary anti-inflammatory and anti-bacterial evaluation of some  
Diflunisal aza-analogs.

Davide Carta,<sup>a§</sup> Paola Brun,<sup>b§</sup> Matteo Dal Pra,<sup>a</sup> Giulia Bernabè,<sup>b</sup> Ignazio Castagliuolo,<sup>b</sup> Maria Grazia Ferlin<sup>\*a</sup>

a) Department of Pharmaceutical and Pharmacological Sciences, University of Padova, 35131  
Padova, Italy.

b) Department of Molecular Medicine, University of Padova, 35131 Padova, Italy.

§ These authors contributed equally to this work.

\* Corresponding author: [mariagrazia.ferlin@unipd.it](mailto:mariagrazia.ferlin@unipd.it)

### **Content:**

1.  $^1\text{H}$  NMR spectra of some representative compounds **14, 19, 20, 22, 42, 44, 49, 50, 51, 54**
2.  $^{13}\text{C}$  NMR spectra of some representative compounds **14, 19, 20, 42, 49, 50, 51, 54**
3. Table S1: Predicted LogP for synthesised compounds, and the reference compound Diflunisal
4. MIC values for tested antibiotics

### <sup>1</sup>H NMR of compound **14**

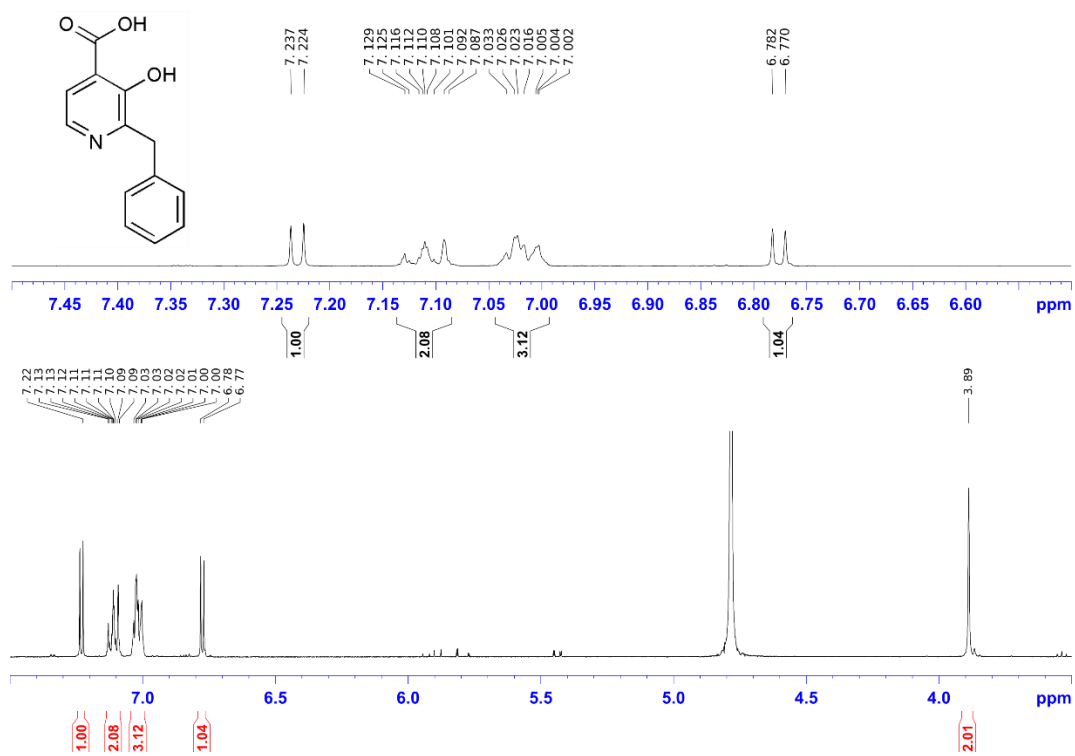

### <sup>1</sup>H NMR of compound **19**

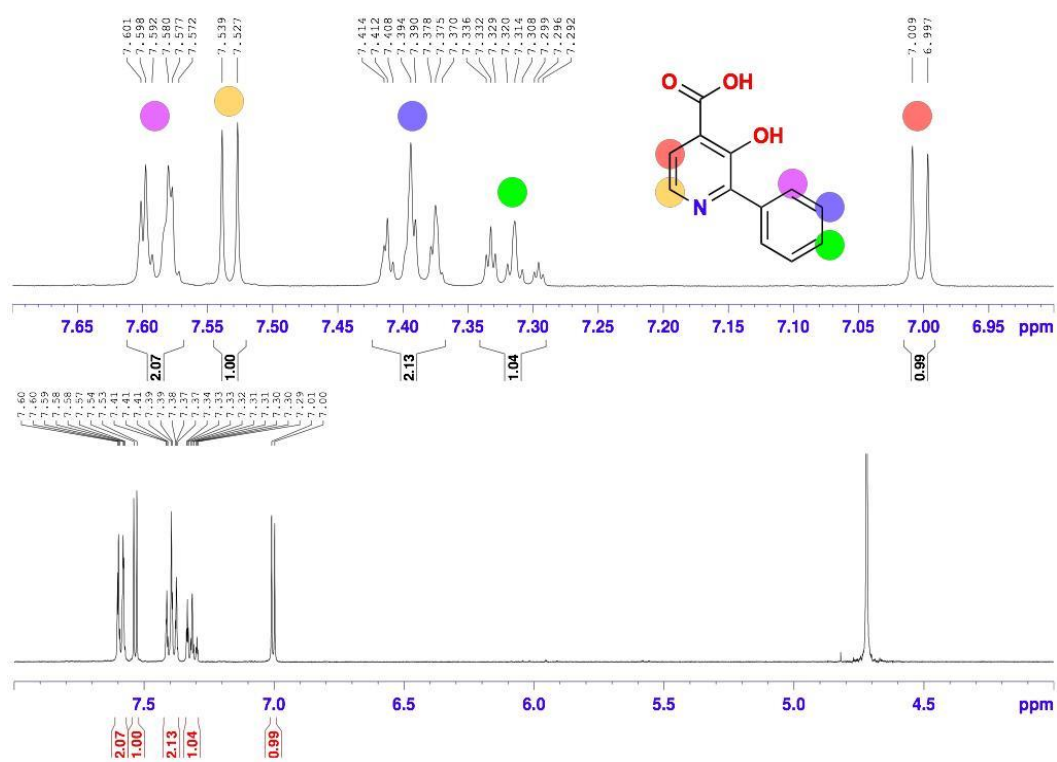

<sup>1</sup>H NMR of compound **20**

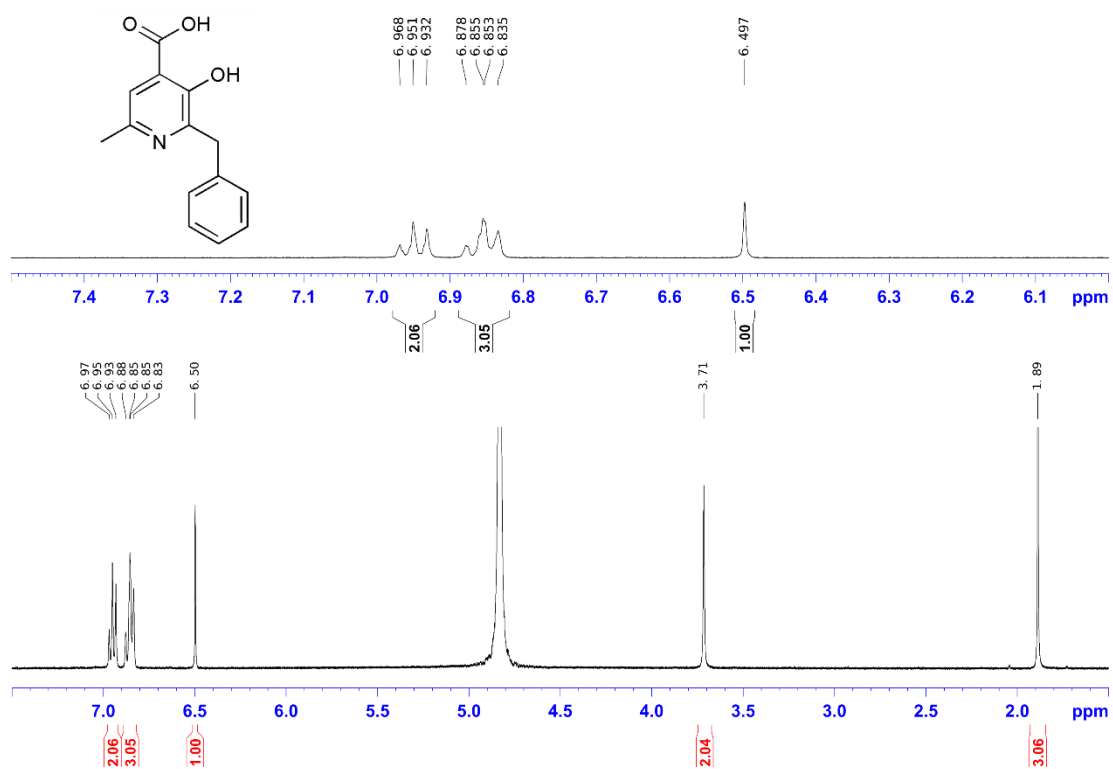

<sup>1</sup>H NMR of compound **22**

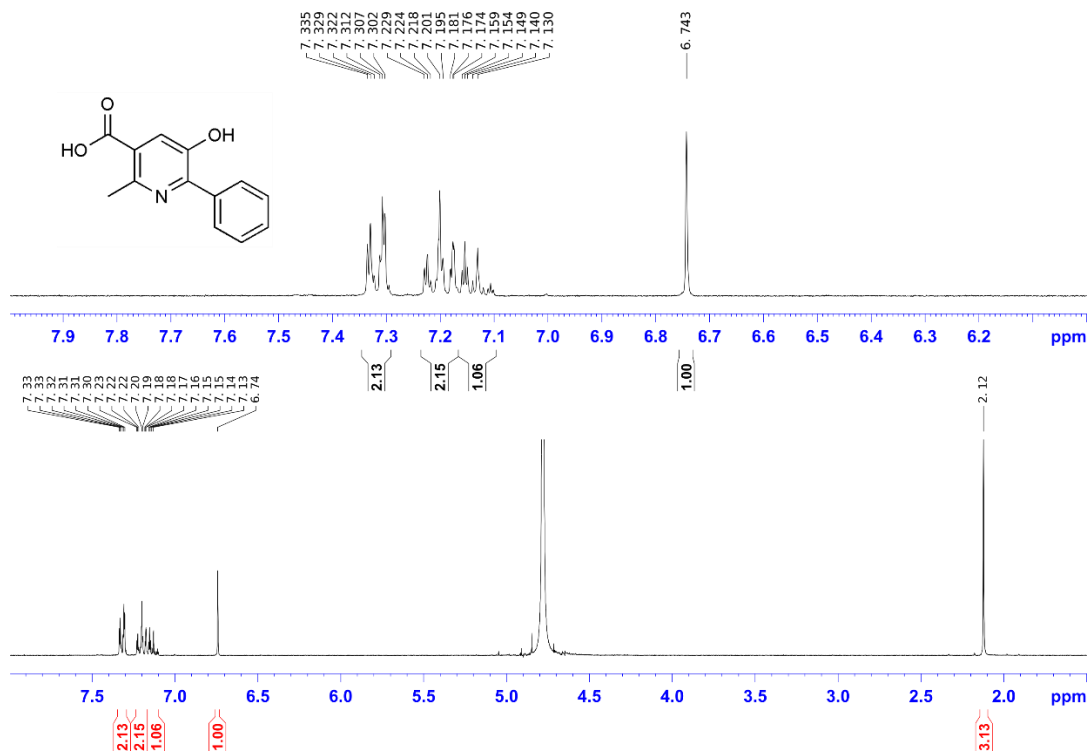

<sup>1</sup>H NMR of compound **42**

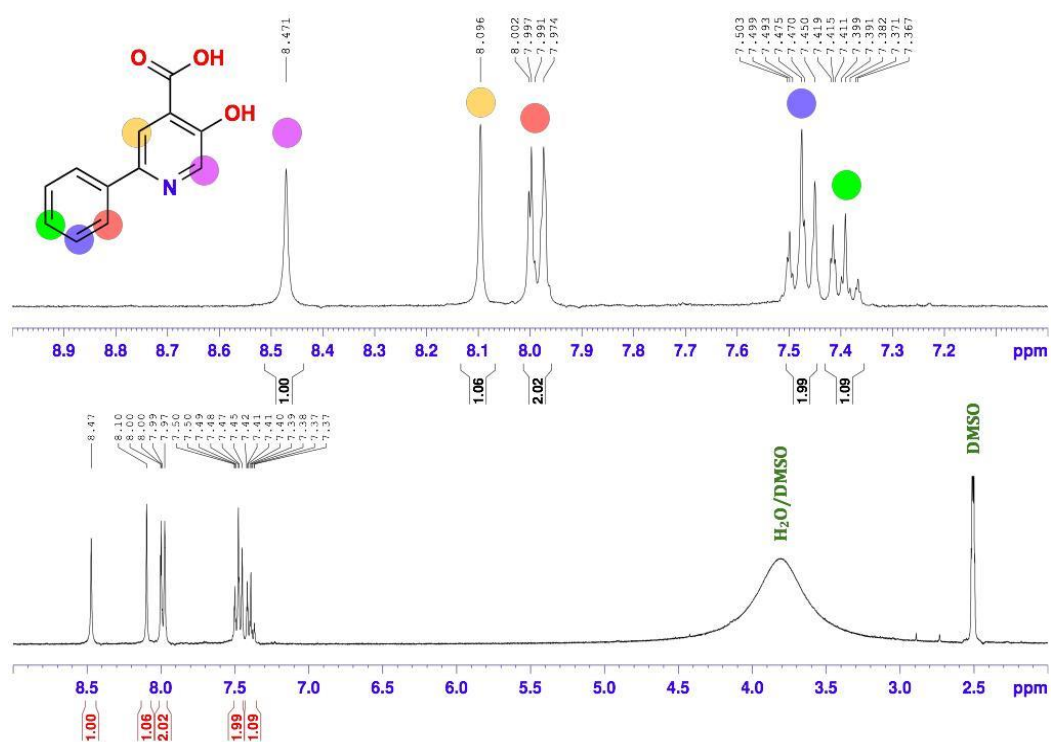

<sup>1</sup>H NMR of compound **44**

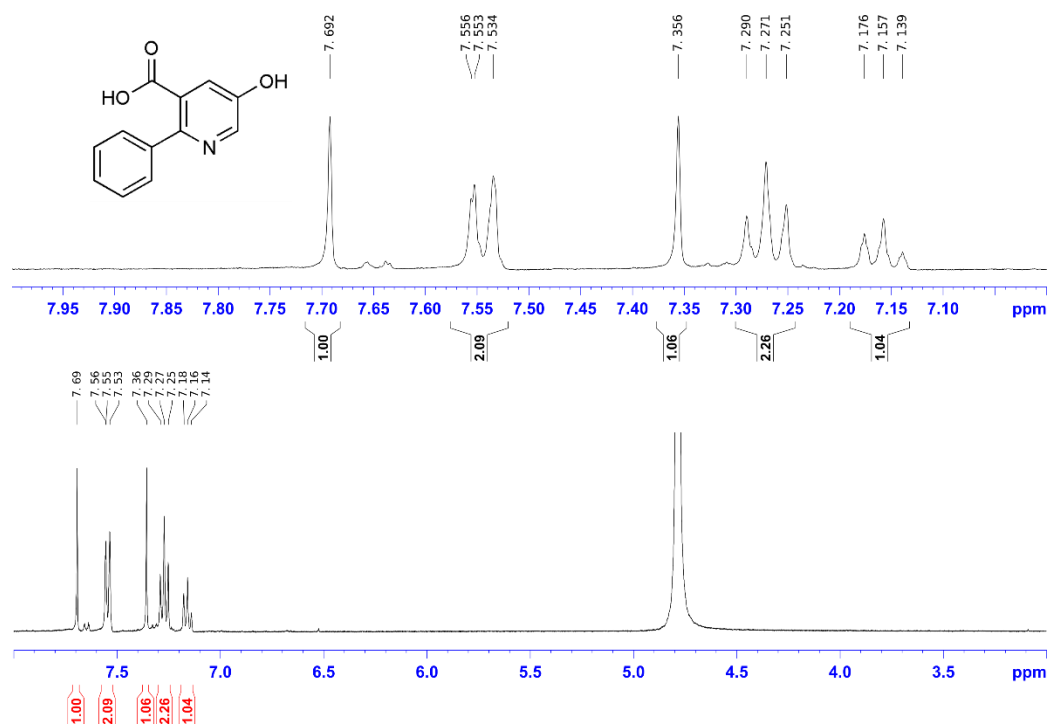

<sup>1</sup>H NMR of compound **49**

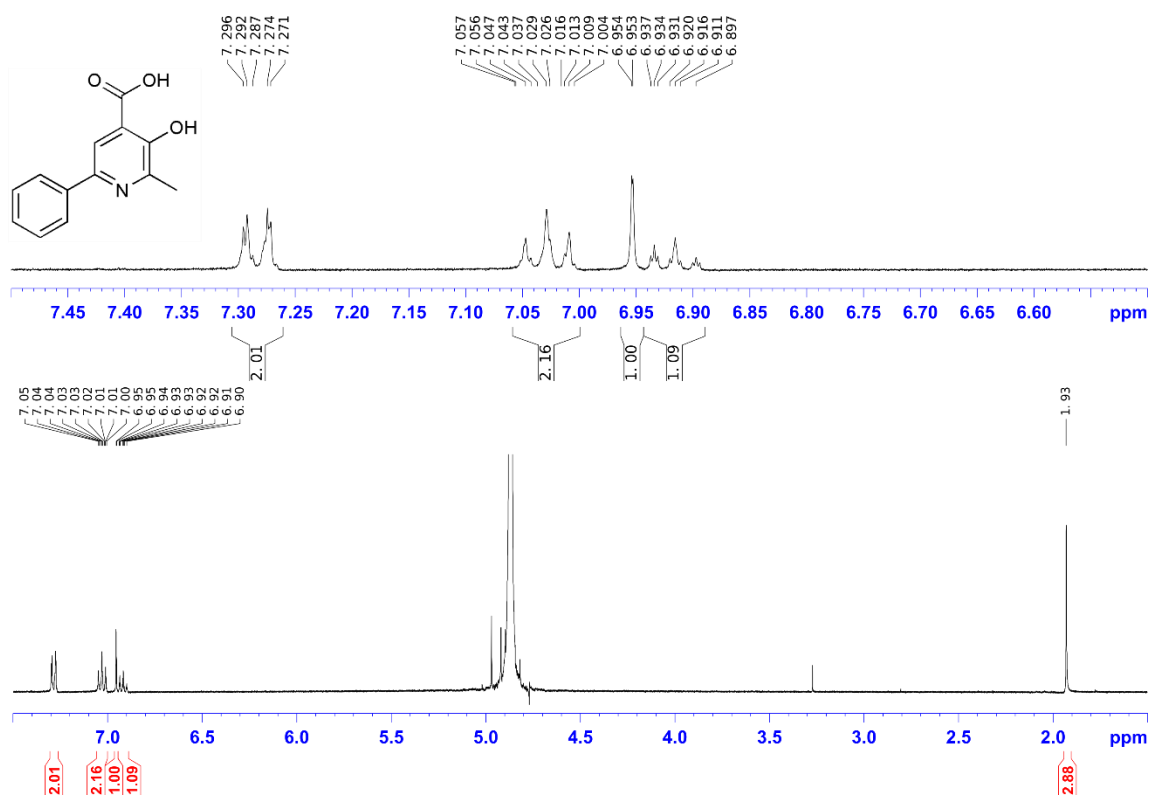

<sup>1</sup>H NMR of compound **50**

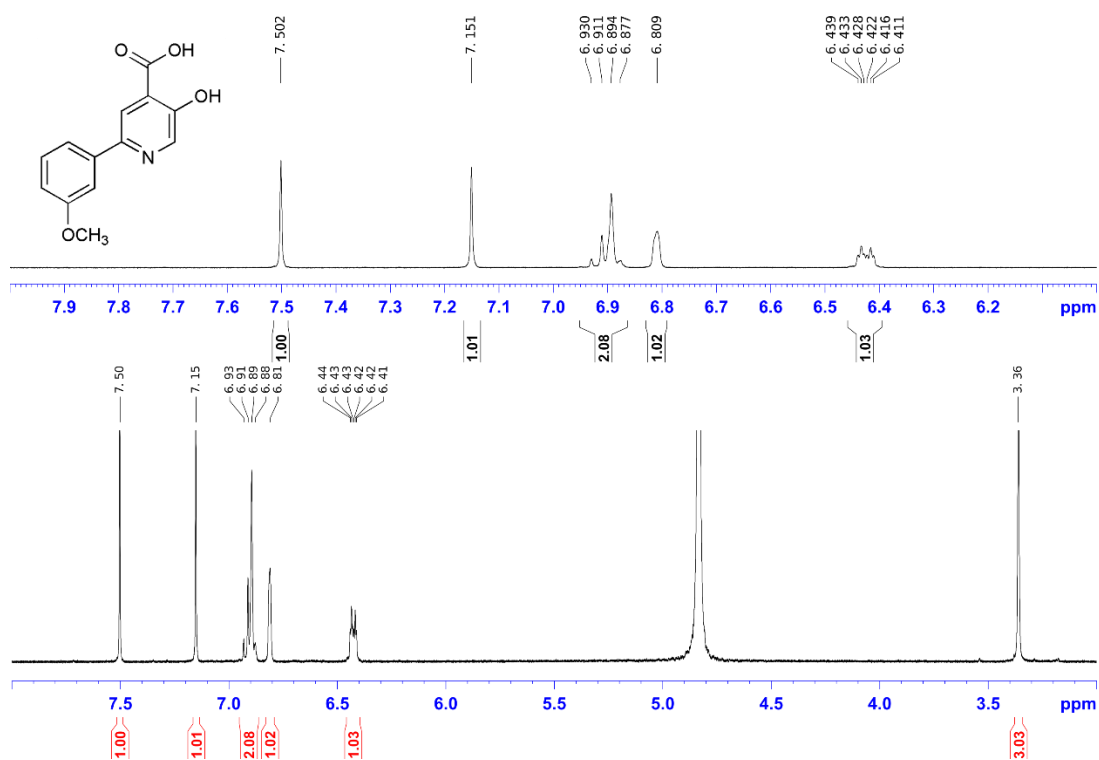

<sup>1</sup>H NMR of compound **51**

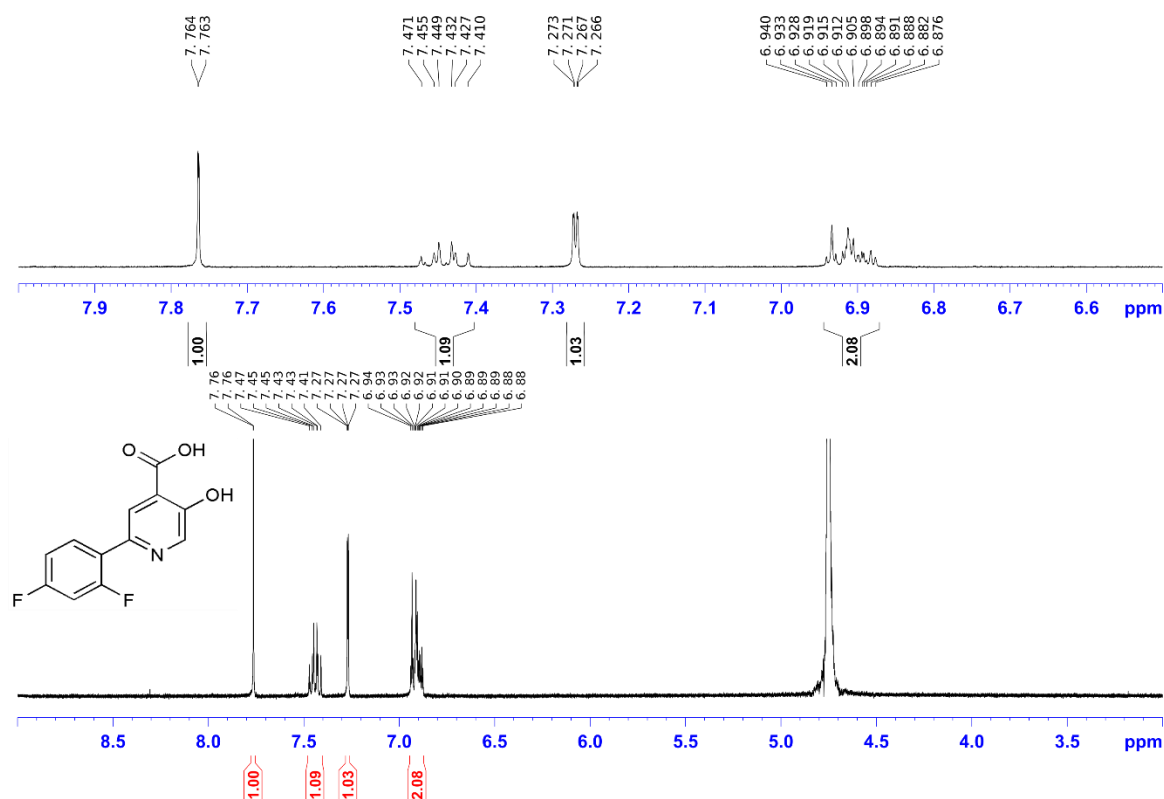

<sup>1</sup>H NMR of compound **54**

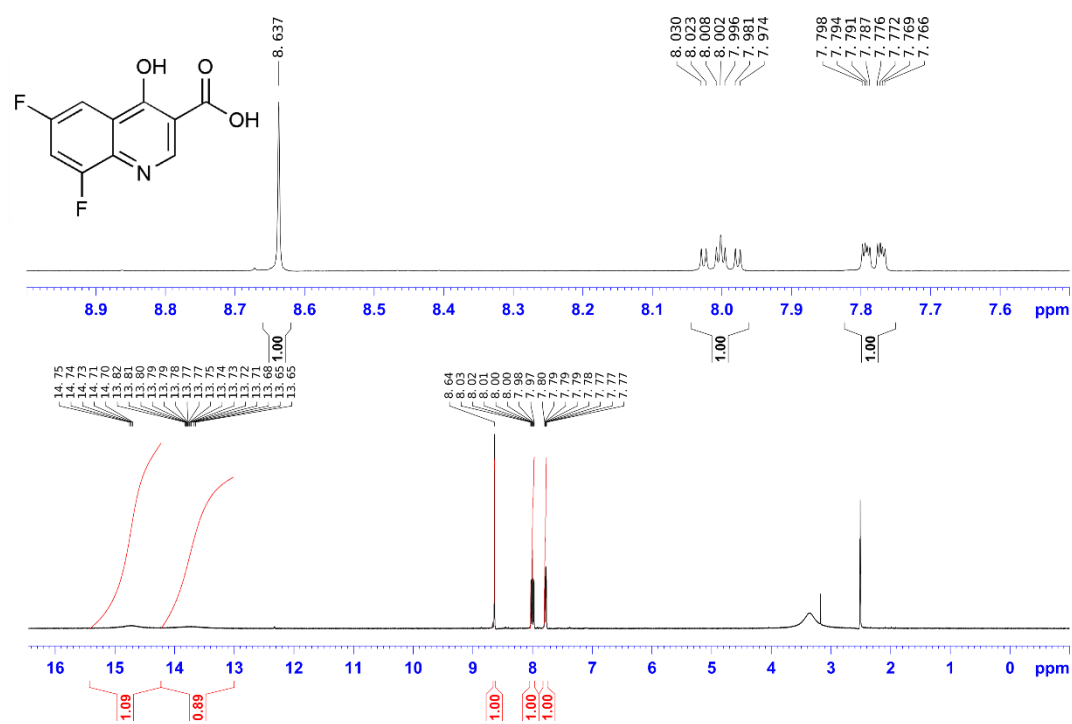

$^{13}\text{C}$  NMR of compound **14**

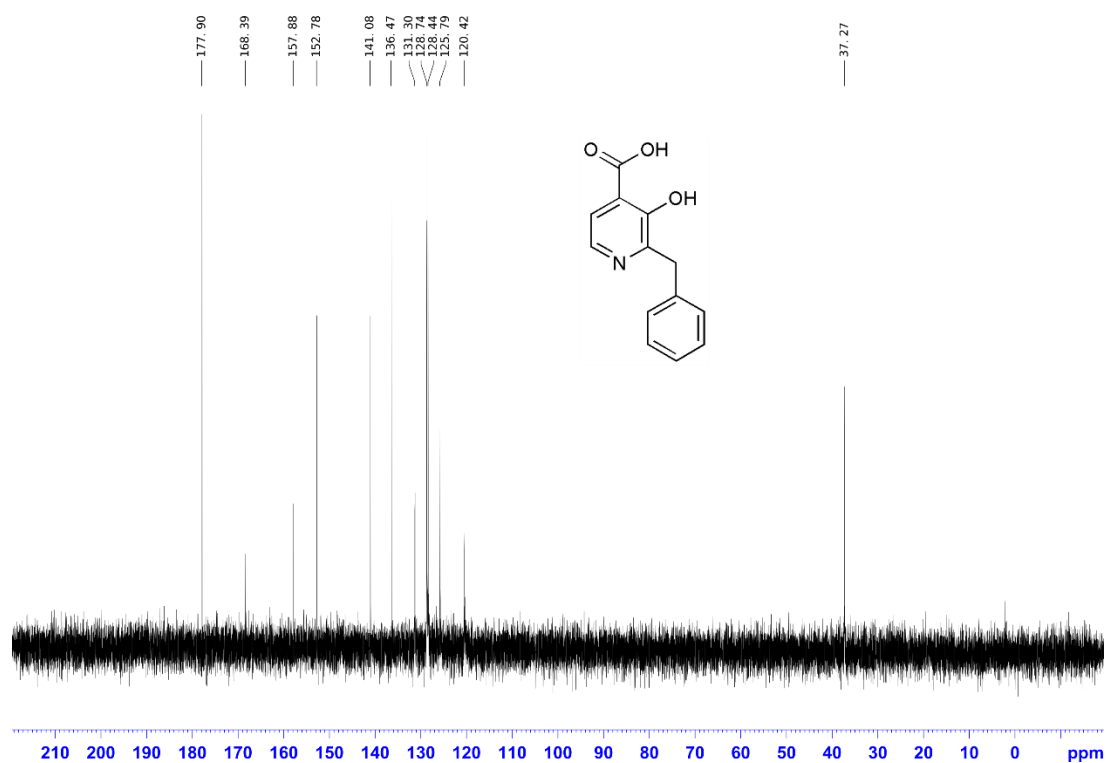

$^{13}\text{C}$  NMR of compound **19**

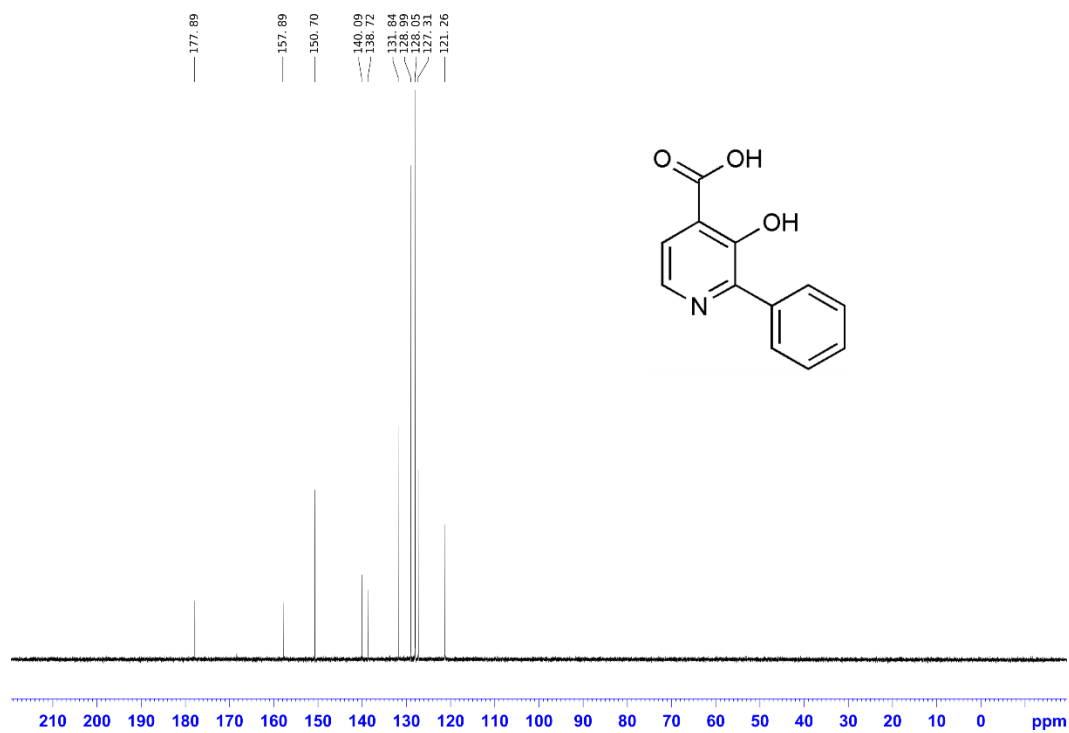



$^{13}\text{C}$  NMR of compound **20**

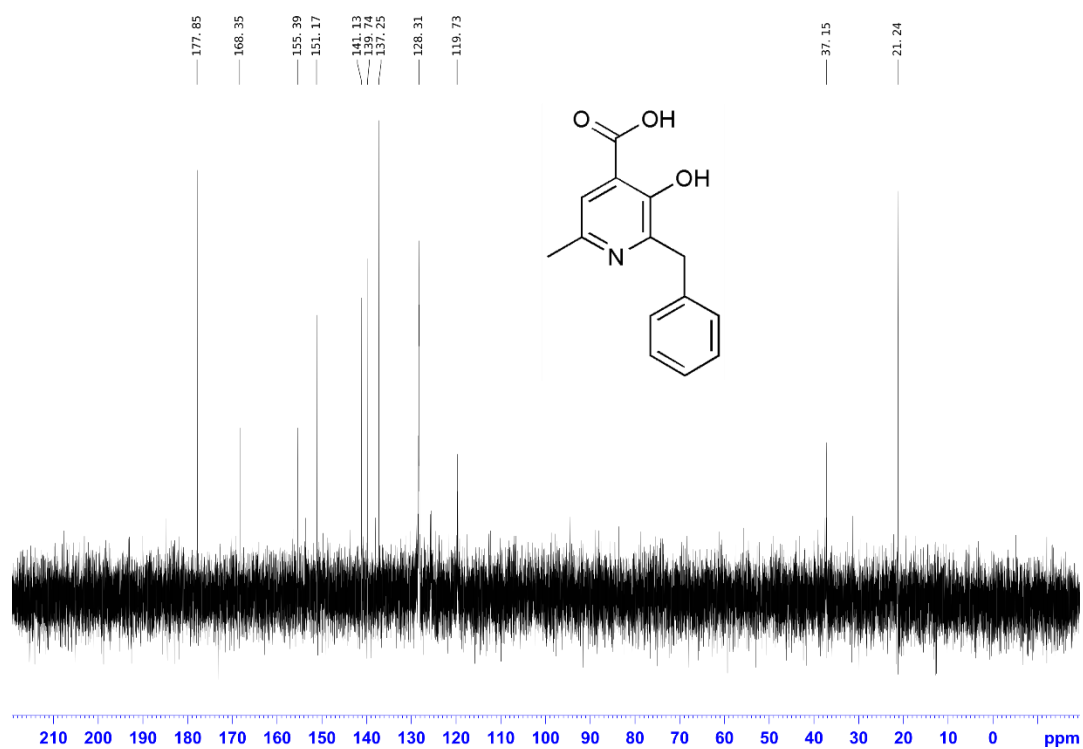

$^{13}\text{C}$  NMR of compound **42**

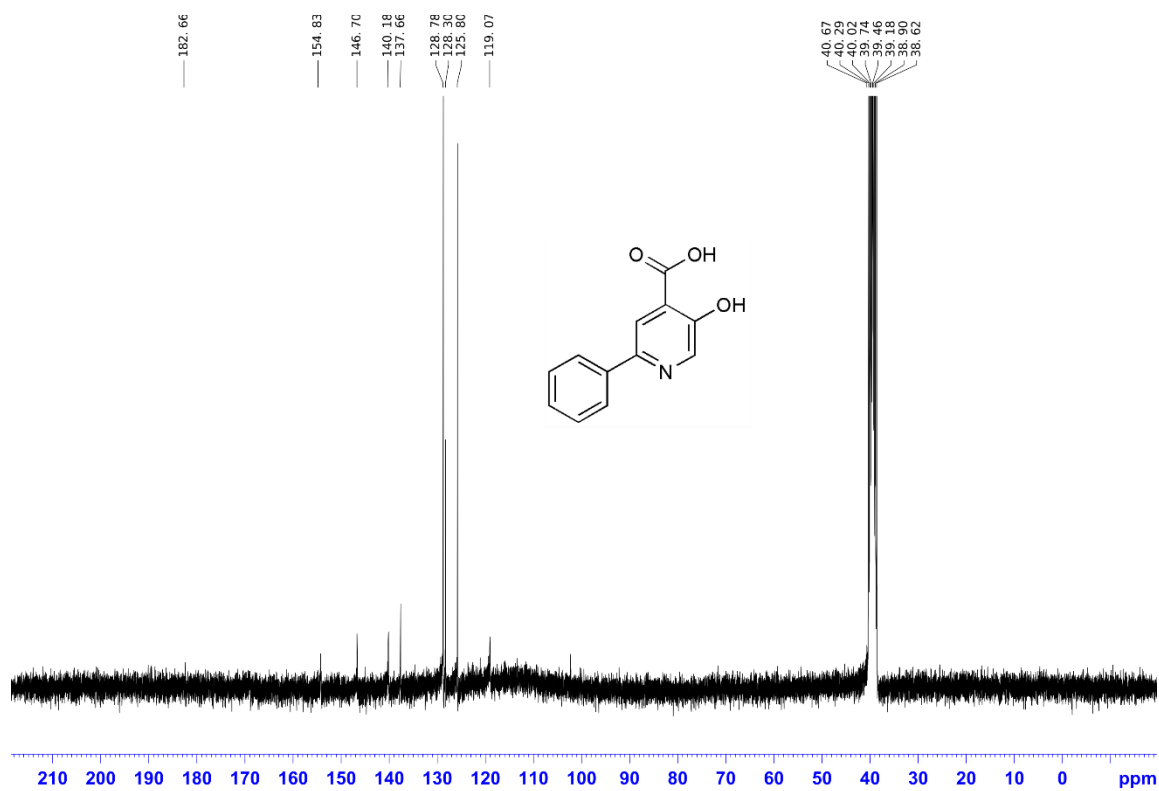

<sup>13</sup>C NMR of compound **49**

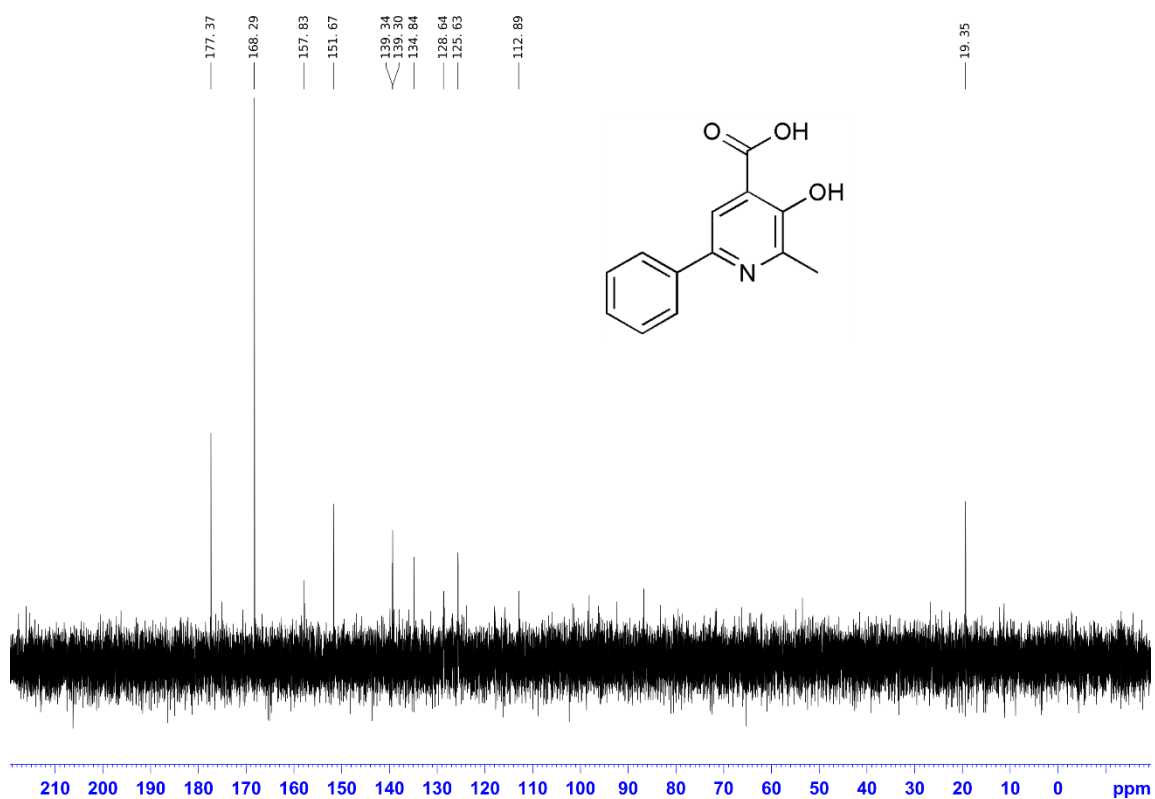

<sup>13</sup>C NMR of compound **50**

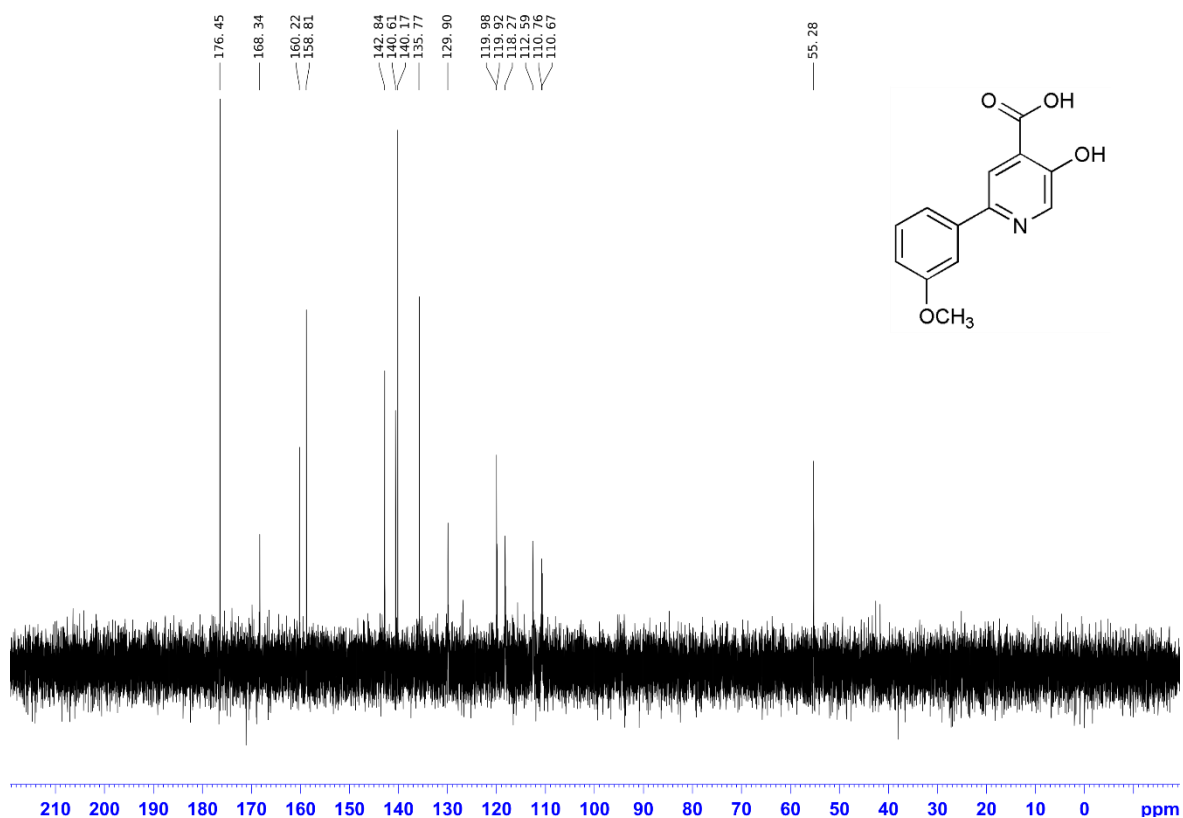

<sup>13</sup>C NMR of compound **51**

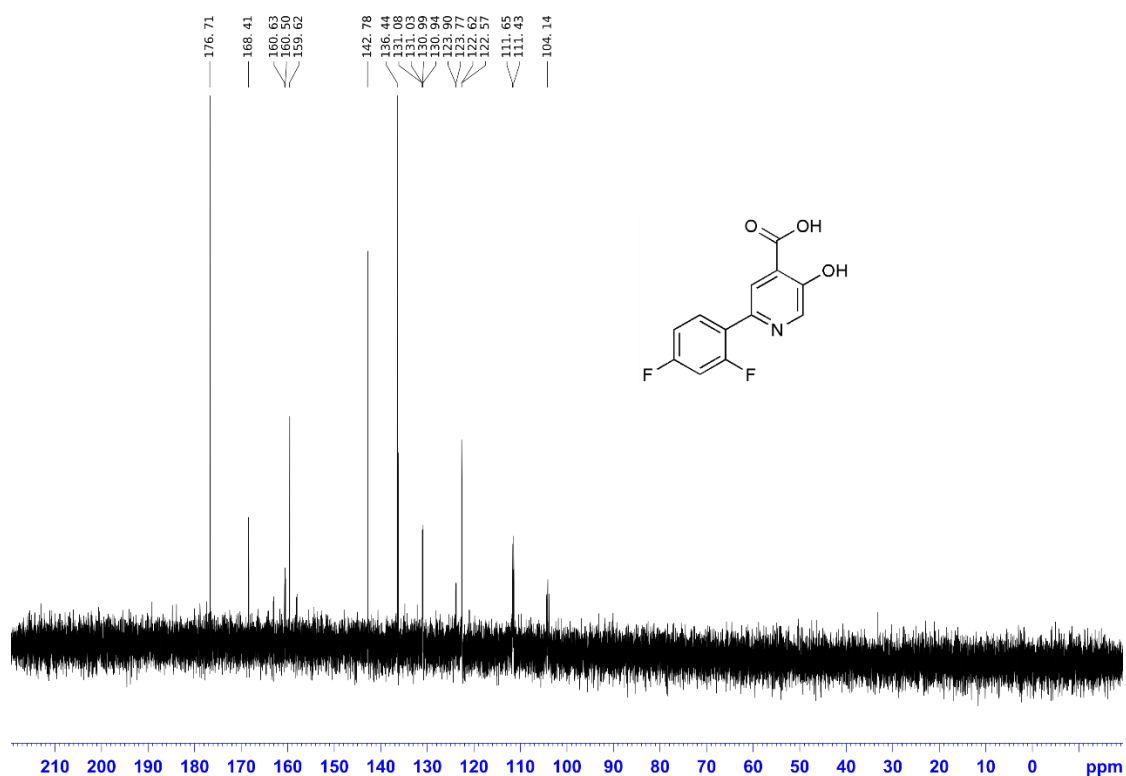

<sup>13</sup>C NMR of compound **54**

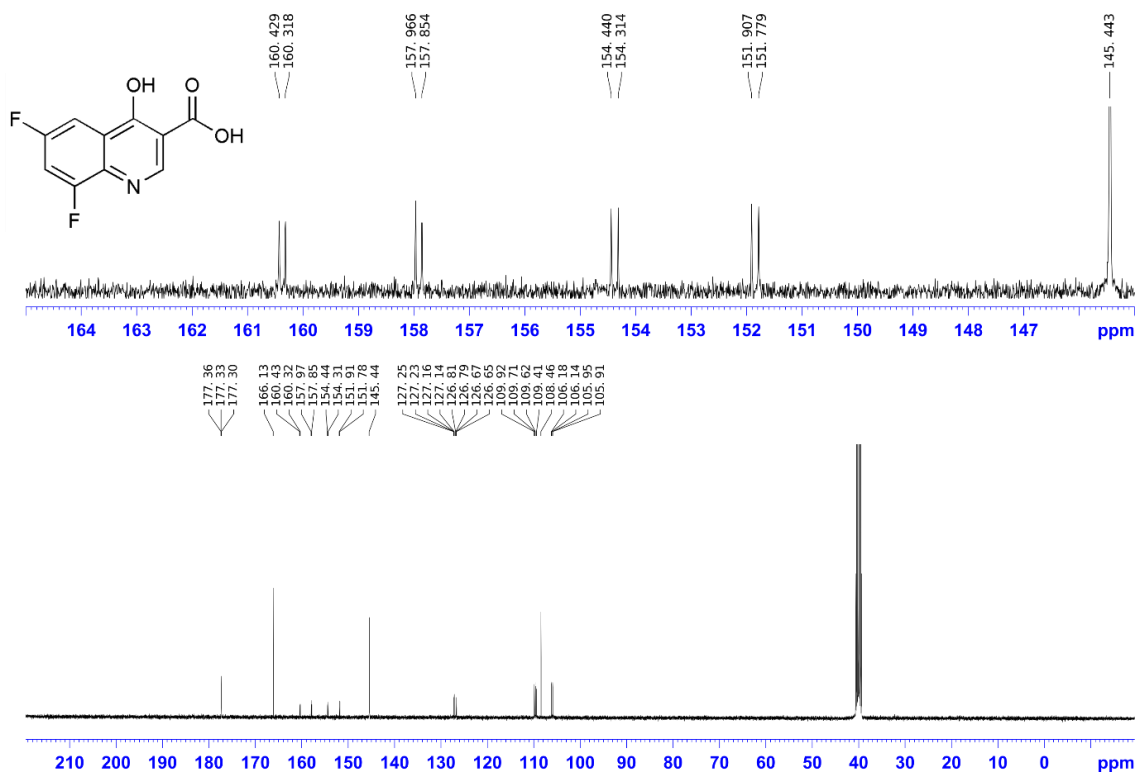

Table S1: Predicted LogP for synthesised compounds, and the reference compound Diflunisal, calculated with the software ChemDraw Ultra 8 (2003)

| <b>Compound</b> | <b>LogP</b> |
|-----------------|-------------|
| Diflunisal      | 3.19        |
| 14              | 2.24        |
| 19              | 1.96        |
| 20              | 2.95        |
| 21              | 1.96        |
| 22              | 2.67        |
| 42              | 1.96        |
| 43              | 4.06        |
| 44              | 1.96        |
| 45              | 4.06        |
| 49              | 2.67        |
| 50              | 1.84        |
| 51              | 2.28        |
| 54              | 1.6         |

MIC values for tested antibiotics (mcg/mL)

|            | <i>S. aureus</i> | <i>S. pyogenes</i> | <i>K. pneumoniae</i> | <i>E. faecium</i> | <i>P. aeruginosa</i> | <i>E. coli</i> |
|------------|------------------|--------------------|----------------------|-------------------|----------------------|----------------|
| <b>MET</b> | 42               | 32                 | 32                   | 10                | 32                   | 4              |
| <b>GEN</b> | 130              | 30                 | 8                    | 120               | 16                   | 2              |
| <b>CPR</b> | 17               | 0.54               | 0.25                 | 5                 | 0.25                 | 1              |
| <b>TET</b> | 100              | 10                 | 16                   | 30                | 20                   | 2              |
| <b>ERY</b> | 42               | 0.23               | 4                    | 10                | 2                    | 2              |
